# Supplementary material for: The mechanism and activity of oxygen reduction reaction on single atom doped graphene: a DFT method
Source: Royal Society of Chemistry journal article supplement (doi:10.1039/c9ra00167k), 2019-01-01
Supplement: c9ra00167k1.pdf [file c9ra00167k1.pdf]

## Supporting Information

### *The catalytic activity and mechanism of oxygen reduction reaction on single atom doped graphene: a DFT method*

*Xiaoming Zhang<sup>a</sup>, Zhangxun Xia<sup>a</sup>, Huanqiao Li<sup>a</sup>, Shansheng Yu<sup>b</sup>, Suli Wang<sup>a\*</sup>, Gongquan Sun<sup>a\*</sup>*

*<sup>a</sup>Division of Fuel Cells and Battery, Dalian National Laboratory for Clean Energy, Dalian Institute of Chemical Physics, Chinese Academy of Sciences, Dalian, China 116023*

*<sup>b</sup>Department of Materials Science, Jilin University, Changchun 130012, China*

*Keywords: aqueous solution, electric field, ORR, DFT*

*\*Corresponding author: Gongquan Sun, e-mail: [gqsun@dicp.ac.cn](mailto:gqsun@dicp.ac.cn) & Suli Wang, e-mail: [suliwang@dicp.ac.cn](mailto:suliwang@dicp.ac.cn)*

## Figures and Tables

Table S 1 The adsorption energy of various convergence test for important parameters (Orbital cut-off quality and k-point set) and slab size

| Slab size | $\Delta E_{ads}^{DFT}$ | k-point | $\Delta E_{ads}^{DFT}$ | Cut-off | $\Delta E_{ads}^{DFT}$ |
|-----------|------------------------|---------|------------------------|---------|------------------------|
| p(3x3)    | -0.61                  | 5x5x1   | -0.61                  | 4.8     | -0.58                  |
| p(4x4)    | -0.61                  | 6x6x1   | -0.61                  | 5.0     | -0.57                  |
| p(5x5)    | -0.61                  | 7x7x1   | -0.61                  | 5.2     | -0.61                  |
| p(6x6)    | -0.63                  | 8x8x1   | -0.61                  | 5.4     | -0.58                  |

Table S 2 The bond length of X-C ( $l_{x-c}$ ), height of X atoms above graphene plane ( $h_x$ ), Mulliken charge of X atoms ( $Q_x$ ) and adjacent C atoms ( $Q_c$ ) as well as p electrons band center of X atoms ( $\epsilon_p$ ) in X-SV catalysts

| Catalyst           | Atomic radius* ( $\text{\AA}$ ) | $l_{x-c}$ ( $\text{\AA}$ ) | $l_{c-c}$ ( $\text{\AA}$ ) | $h_x$ ( $\text{\AA}$ ) | $xp^*$ | $Q_x$ (e) | $Q_c$ (e) | $\epsilon_{sp}$ (eV) |
|--------------------|---------------------------------|----------------------------|----------------------------|------------------------|--------|-----------|-----------|----------------------|
| B@Gra <sup>#</sup> | 0.88                            | 1.48                       | 1.41                       | 0.00                   | 2.00   | 0.01      | -0.13     | 5.97                 |
| C@Gra <sup>#</sup> | 0.77                            | 1.42                       | 1.42                       | 0.00                   | 2.50   | 0.00      | 0.00      | -1.33                |
| N@Gra <sup>#</sup> | 0.70                            | 1.41                       | 1.42                       | 0.00                   | 3.00   | -0.30     | 0.14      | -4.23                |
| O@Gra <sup>#</sup> | 0.73                            | 1.49                       | 1.39                       | 0.00                   | 3.50   | -0.51     | 0.22      | -5.78                |
| Al@Gra             | 1.43                            | 1.86                       | 1.41                       | 1.66                   | 1.50   | 1.10      | -0.56     | 5.58                 |
| Si@Gra             | 1.17                            | 1.77                       | 1.41                       | 1.38                   | 1.80   | 0.87      | -0.47     | 4.25                 |
| P@Gra              | 1.10                            | 1.77                       | 1.40                       | 1.33                   | 2.10   | 0.61      | -0.37     | 1.90                 |
| S@Gra              | 1.04                            | 1.75                       | 1.40                       | 1.18                   | 2.50   | 0.54      | -0.31     | -0.37                |
| Ga@Gra             | 1.35                            | 1.87                       | 1.41                       | 1.67                   | 1.60   | 0.36      | -0.30     | 6.29                 |
| Ge@Gra             | 1.22                            | 1.89                       | 1.41                       | 1.68                   | 1.80   | 0.10      | -0.22     | 4.69                 |
| As@Gra             | 1.20                            | 1.92                       | 1.40                       | 1.67                   | 2.00   | 0.03      | -0.18     | 3.02                 |
| Se@Gra             | 1.19                            | 1.90                       | 1.40                       | 1.53                   | 2.40   | 0.11      | -0.16     | 1.18                 |
| In@Gra             | 1.67                            | 2.28                       | 1.41                       | 2.24                   | 1.70   | 0.48      | -0.34     | 5.98                 |
| Sn@Gra             | 1.40                            | 2.17                       | 1.41                       | 2.21                   | 1.80   | 0.47      | -0.35     | 6.00                 |
| Sb@Gra             | 1.40                            | 2.13                       | 1.40                       | 2.10                   | 1.90   | 0.49      | -0.34     | 4.37                 |
| Te@Gra             | 1.42                            | 2.09                       | 1.40                       | 1.95                   | 2.10   | 0.53      | -0.33     | 2.70                 |
| Tl@Gra             | 1.70                            | 2.69                       | 1.40                       | 2.50                   | 1.80   | 0.45      | -0.28     | 6.03                 |
| Pb@Gra             | 1.46                            | 2.31                       | 1.41                       | 2.40                   | 1.90   | 0.59      | -0.39     | 6.22                 |
| Bi@Gra             | 1.50                            | 2.26                       | 1.40                       | 2.29                   | 1.90   | 0.62      | -0.53     | -0.89                |

\* A.E. N.N. Greenwood, Chemistry of the Elements, second ed. Butterworth-Heinemann, Oxford (1997)

Table S 3 The bond length of X-C ( $l_{x-c}$ ), height of X atoms above graphene plane ( $h_x$ ), Mulliken charge of X atoms ( $Q_x$ ) and adjacent C atoms ( $Q_c$ ) as well as p electrons band center of X atoms ( $\epsilon_p$ ) in X-SV catalysts

| Catalyst            | Atomic radius(Å) | $l_{x-c}$ (Å) | $l_{c-c}$ (Å) | $h_x$ (Å) | $xp$ | $Q_x$ (e) | $Q_c$ (e) | $\epsilon_{sp}$ (eV) |
|---------------------|------------------|---------------|---------------|-----------|------|-----------|-----------|----------------------|
| Al@Gra <sup>#</sup> | 1.43             | 1.94          | 1.40, 1.38    | 0.00      | 1.61 | 1.31      | -0.52     | 6.53                 |
| Si@Gra <sup>#</sup> | 1.17             | 1.89          | 1.43, 1.39    | 0.00      | 1.90 | 1.16      | -0.48     | 6.05                 |
| P@Gra <sup>#</sup>  | 1.10             | 1.85          | 1.45, 1.39    | 0.00      | 2.19 | 0.91      | -0.39     | 3.61                 |
| S@Gra <sup>#</sup>  | 1.04             | 1.87          | 1.45, 1.37    | 0.00      | 2.58 | 0.58      | -0.28     | -0.99                |
| Ga@Gra <sup>#</sup> | 1.53             | 1.96          | 1.40, 1.38    | 0.00      | 1.81 | 0.40      | -0.25     | 6.27                 |
| Ge@Gra <sup>#</sup> | 1.22             | 1.94          | 1.41, 1.38    | 0.00      | 2.01 | 0.44      | -0.26     | 5.64                 |
| As@Gra <sup>#</sup> | 1.21             | 1.92          | 1.42, 1.38    | 0.00      | 2.18 | 0.46      | -0.26     | 5.05                 |
| Se@Gra              | 1.17             | 1.98          | 1.42, 1.38    | 0.69      | 2.55 | 0.28      | -0.20     | 2.23                 |
| In@Gra              | 1.67             | 2.18          | 1.40, 1.40    | 1.46      | 1.78 | 0.66      | -0.32     | 6.28                 |
| Sn@Gra              | 1.58             | 2.27          | 1.41, 1.40    | 1.65      | 1.96 | 0.49      | -0.31     | 5.67                 |
| Sb@Gra              | 1.41             | 2.19          | 1.41, 1.39    | 1.53      | 2.05 | 0.51      | -0.32     | 4.89                 |
| Te@Gra              | 1.37             | 2.13          | 1.42, 1.38    | 1.38      | 2.10 | 0.60      | -0.32     | 3.31                 |
| Tl@Gra              | 1.71             | 2.69          | 1.42, 1.40    | 2.12      | 2.04 | 0.46      | -0.25     | 6.10                 |
| Pb@Gra              | 1.75             | 2.40          | 1.41, 1.40    | 1.89      | 2.33 | 0.57      | -0.33     | 5.92                 |
| Bi@Gra              | 1.82             | 2.31          | 1.41, 1.39    | 1.81      | 2.02 | 0.60      | -0.45     | -0.28                |

Table S 4 The binding energies between X atoms and defective graphene with or without considered water solution.

| Without water | $\Delta E_b$ |       |               | $\Delta E_b$ |       |               | $\Delta E_b$ |       |
|---------------|--------------|-------|---------------|--------------|-------|---------------|--------------|-------|
|               | SV           | DV    |               | SV           | DV    |               | SV           | DV    |
| <i>B@Gra</i>  | -13.01       |       | <i>Ga@Gra</i> | -4.30        | -4.54 | <i>Tl@Gra</i> | -0.23        | 0.10  |
| <i>C@Gra</i>  | -15.61       |       | <i>Ge@Gra</i> | -6.46        | -5.71 | <i>Pb@Gra</i> | -1.90        | -1.60 |
| <i>N@Gra</i>  | -12.14       |       | <i>As@Gra</i> | -6.81        | -5.73 | <i>Bi@Gra</i> | -1.93        | -1.41 |
| <i>O@Gra</i>  | -7.97        |       | <i>Se@Gra</i> | -5.49        | -4.93 |               |              |       |
| <i>Al@Gra</i> | -5.44        | -5.80 | <i>In@Gra</i> | -2.66        | -2.07 |               |              |       |
| <i>Si@Gra</i> | -8.25        | -7.88 | <i>Sn@Gra</i> | -4.68        | -3.08 |               |              |       |
| <i>P@Gra</i>  | -8.45        | -7.72 | <i>Sb@Gra</i> | -5.25        | -3.45 |               |              |       |
| <i>S@Gra</i>  | -6.94        | -6.16 | <i>Te@Gra</i> | -4.10        | -3.29 |               |              |       |
| With water    | $\Delta E_b$ |       |               | $\Delta E_b$ |       |               | $\Delta E_b$ |       |
|               | SV           | DV    |               | SV           | DV    |               | SV           | DV    |
| <i>B@Gra</i>  | -12.99       |       | <i>Ga@Gra</i> | -4.35        | -4.56 | <i>Tl@Gra</i> | -0.28        | 0.01  |
| <i>C@Gra</i>  | -15.58       |       | <i>Ge@Gra</i> | -6.44        | -5.68 | <i>Pb@Gra</i> | -1.90        | -1.65 |
| <i>N@Gra</i>  | -12.13       |       | <i>As@Gra</i> | -6.80        | -5.69 | <i>Bi@Gra</i> | -1.95        | -1.46 |
| <i>O@Gra</i>  | -7.99        |       | <i>Se@Gra</i> | -5.55        | -4.98 |               |              |       |
| <i>Al@Gra</i> | -5.46        | -5.79 | <i>In@Gra</i> | -2.68        | -2.66 |               |              |       |
| <i>Si@Gra</i> | -8.24        | -7.85 | <i>Sn@Gra</i> | -4.67        | -4.17 |               |              |       |
| <i>P@Gra</i>  | -8.44        | -7.66 | <i>Sb@Gra</i> | -5.29        | -4.65 |               |              |       |
| <i>S@Gra</i>  | -6.95        | -6.09 | <i>Te@Gra</i> | -4.27        | -4.36 |               |              |       |

Table S 5 The free energy of O\*, OH\* and OOH\* on various X-SV/DV catalysts

| Catalyst     | $\Delta G_{OH^*}$ | $\Delta G_{OOH^*}$ | $\Delta G_{O^*}$ |
|--------------|-------------------|--------------------|------------------|
| <i>N-SV</i>  | 1.21              | 4.45               | 2.44             |
| <i>Al-SV</i> | -1.18             | 2.25               | 1.28             |
| <i>Ga-SV</i> | -0.23             | 3.14               | 2.00             |
| <i>Ge-SV</i> | -0.16             | 3.27               | 1.67             |
| <i>In-SV</i> | -0.27             | 3.20               | 1.60             |
| <i>Te-SV</i> | 0.76              | 4.03               | 2.40             |
| <i>Al-DV</i> | -0.34             | 3.15               | 2.22             |
| <i>Si-DV</i> | -0.46             | 3.05               | 1.56             |
| <i>Ga-DV</i> | 0.26              | 3.59               | 2.76             |
| <i>Ge-DV</i> | -0.11             | 3.30               | 2.00             |
| <i>In-DV</i> | -0.24             | 3.11               | 2.21             |
| <i>Sn-DV</i> | -0.05             | 3.38               | 2.00             |
| <i>Sb-DV</i> | 0.64              | 4.10               | 2.15             |
| <i>Tl-DV</i> | 0.13              | 3.51               | 2.45             |

Table S 6 The reaction free energy for each step of the ORR elementary reaction on various X-SV/DV catalysts with pH=13 and  $U^{NHE}=0.44$  V

|              |              |              |              |              |              |              |              |
|--------------|--------------|--------------|--------------|--------------|--------------|--------------|--------------|
|              | <i>Al-SV</i> | <i>Si-DV</i> | <i>In-SV</i> | <i>Ge-SV</i> | <i>Te-SV</i> | <i>Sb-DV</i> | <i>N-SV</i>  |
| $\Delta G_1$ | -1.44        | -0.64        | -0.49        | -0.42        | 0.34         | 0.41         | 0.76         |
| $\Delta G_2$ | 0.26         | -0.27        | -0.37        | -0.37        | -0.40        | -0.72        | -0.78        |
| $\Delta G_3$ | -1.23        | -0.79        | -0.64        | -0.61        | -0.40        | -0.28        | 0.00         |
| $\Delta G_4$ | 2.41         | 1.69         | 1.50         | 1.39         | 0.47         | 0.59         | 0.02         |
|              | <i>Al-DV</i> | <i>In-DV</i> | <i>Ga-SV</i> | <i>Ge-DV</i> | <i>Sn-DV</i> | <i>Tl-DV</i> | <i>Ga-DV</i> |
| $\Delta G_1$ | -0.55        | -0.58        | -0.55        | -0.40        | -0.31        | -0.18        | -0.10        |
| $\Delta G_2$ | 0.31         | 0.33         | 0.10         | -0.06        | -0.15        | 0.17         | 0.40         |
| $\Delta G_3$ | -1.33        | -1.12        | -1.00        | -0.88        | -0.82        | -1.09        | -1.27        |
| $\Delta G_4$ | 1.57         | 1.47         | 1.46         | 1.34         | 1.28         | 1.10         | 0.97         |

Table S 7 The calculated  $\Delta G_{OH^*}$  based DFT,  $\Delta G_{OOH^*}$  based on  $\Delta G_{OH^*}$  and their linear relationship on remaining 20 catalysts

|              | $\Delta G_{OH^*}$ | $\Delta G_{OOH^*} = \Delta G_{OH^*} * 0.91 + 3.4$ |
|--------------|-------------------|---------------------------------------------------|
| <i>B-SV</i>  | 1.16              | 4.46                                              |
| <i>C-SV</i>  | 2.38              | 5.57                                              |
| <i>O-SV</i>  | -0.58             | 2.87                                              |
| <i>Si-SV</i> | -1.28             | 2.24                                              |
| <i>P-SV</i>  | -0.46             | 2.98                                              |
| <i>S-SV</i>  | 1.75              | 4.99                                              |
| <i>As-SV</i> | 1.04              | 4.35                                              |
| <i>Se-SV</i> | 1.45              | 4.72                                              |
| <i>Sn-SV</i> | 0.44              | 3.80                                              |
| <i>Sb-SV</i> | 1.37              | 4.65                                              |
| <i>Tl-SV</i> | 0.26              | 3.64                                              |
| <i>Pb-SV</i> | 0.98              | 4.29                                              |
| <i>Bi-SV</i> | 1.45              | 4.72                                              |
| <i>P-DV</i>  | 0.35              | 3.72                                              |
| <i>S-DV</i>  | 2.32              | 5.51                                              |
| <i>As-DV</i> | 0.52              | 3.87                                              |
| <i>Se-DV</i> | 2.17              | 5.37                                              |
| <i>Te-DV</i> | 1.93              | 5.16                                              |
| <i>Pb-DV</i> | 0.61              | 3.96                                              |
| <i>Bi-DV</i> | 1.61              | 4.87                                              |

Table S 8 The calculated  $\Delta G_{OH^*}$  based DFT and their corresponding energy barrier for 14 catalysts

|       | $\Delta G_{OH^*}$ | Energy barrier |
|-------|-------------------|----------------|
| N-SV  | 1.21              | 0.76           |
| Al-SV | -1.2              | 2.41           |
| Ga-SV | -0.23             | 1.46           |
| Ge-SV | -0.16             | 1.39           |
| In-SV | -0.27             | 1.50           |
| Te-SV | 0.76              | 0.47           |
| Al-DV | -0.34             | 1.57           |
| Si-DV | -0.46             | 1.69           |
| Ga-DV | 0.26              | 0.97           |
| Ge-DV | -0.11             | 1.34           |
| In-DV | -0.24             | 1.47           |
| Sn-DV | -0.05             | 1.28           |
| Sb-DV | 0.64              | 0.59           |
| Tl-DV | 0.13              | 1.10           |

Table S 9 The calculated  $\Delta G_{OH^*}$  based DFT,  $\Delta G_1$  and  $\Delta G_4$  based on  $\Delta G_{OH^*}$  and the linear relationship between  $\Delta G_{OH^*}$  and  $\Delta G_{OOH^*}$ , as well as their corresponding energy barrier for remaining 20 catalysts

|       | $\Delta G_{OH^*}$ | $\Delta G_1$ | $\Delta G_4$ | average value of $\Delta G_2$ and $\Delta G_3$ | Max energy barrier |
|-------|-------------------|--------------|--------------|------------------------------------------------|--------------------|
| B-SV  | 1.16              | 0.76         | 0.07         | -0.42                                          | 0.76               |
| C-SV  | 2.38              | 1.87         | -1.15        | -0.36                                          | 1.87               |
| O-SV  | -0.58             | -0.81        | 1.81         | -0.50                                          | 1.81               |
| Si-SV | -1.28             | -1.45        | 2.51         | -0.53                                          | 2.51               |
| P-SV  | -0.46             | -0.71        | 1.69         | -0.49                                          | 1.69               |
| S-SV  | 1.75              | 1.30         | -0.52        | -0.39                                          | 1.30               |
| As-SV | 1.04              | 0.66         | 0.19         | -0.42                                          | 0.66               |
| Se-SV | 1.45              | 1.03         | -0.22        | -0.40                                          | 1.03               |
| Sn-SV | 0.44              | 0.11         | 0.79         | -0.45                                          | 0.79               |
| Sb-SV | 1.37              | 0.96         | -0.14        | -0.41                                          | 0.96               |
| Tl-SV | 0.26              | -0.05        | 0.97         | -0.46                                          | 0.97               |
| Pb-SV | 0.98              | 0.60         | 0.25         | -0.43                                          | 0.60               |
| Bi-SV | 1.45              | 1.03         | -0.22        | -0.40                                          | 1.03               |
| P-DV  | 0.35              | 0.03         | 0.88         | -0.45                                          | 0.88               |
| S-DV  | 2.32              | 1.82         | -1.09        | -0.37                                          | 1.82               |
| As-DV | 0.52              | 0.18         | 0.71         | -0.45                                          | 0.71               |
| Se-DV | 2.17              | 1.68         | -0.94        | -0.37                                          | 1.68               |
| Te-DV | 1.93              | 1.46         | -0.70        | -0.38                                          | 1.46               |
| Pb-DV | 0.61              | 0.26         | 0.62         | -0.44                                          | 0.62               |
| Bi-DV | 1.61              | 1.18         | -0.38        | -0.40                                          | 1.18               |

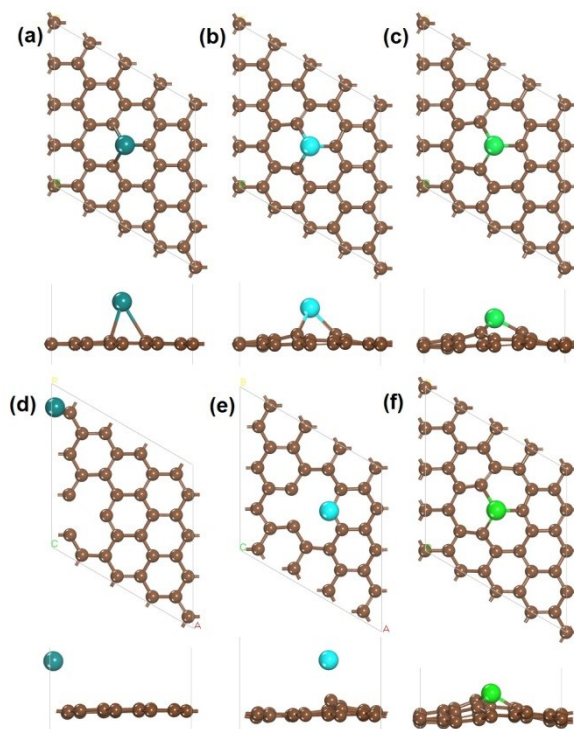

Figure S 1 The geometry structure of TI-SV (a, d), In-SV (b, e) and Ga-SV (c, f) before (a, b, c) and after (d, e, f) first-principles molecular dynamics.

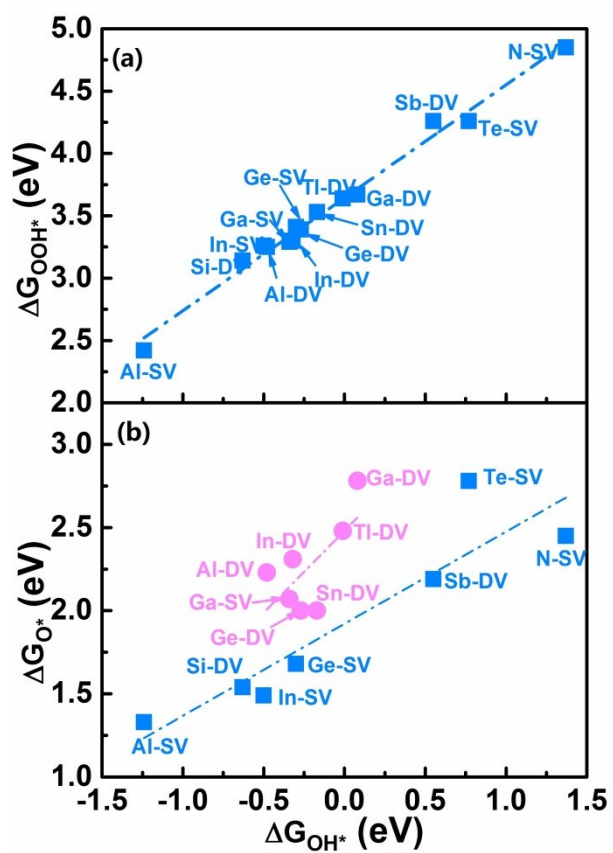

Figure S 2 The scaling relationship between  $\Delta G_{OH^*}$  and  $\Delta G_{OOH^*}$  (a) as well as  $\Delta G_{OH^*}$  and  $\Delta G_{O^*}$

(b).

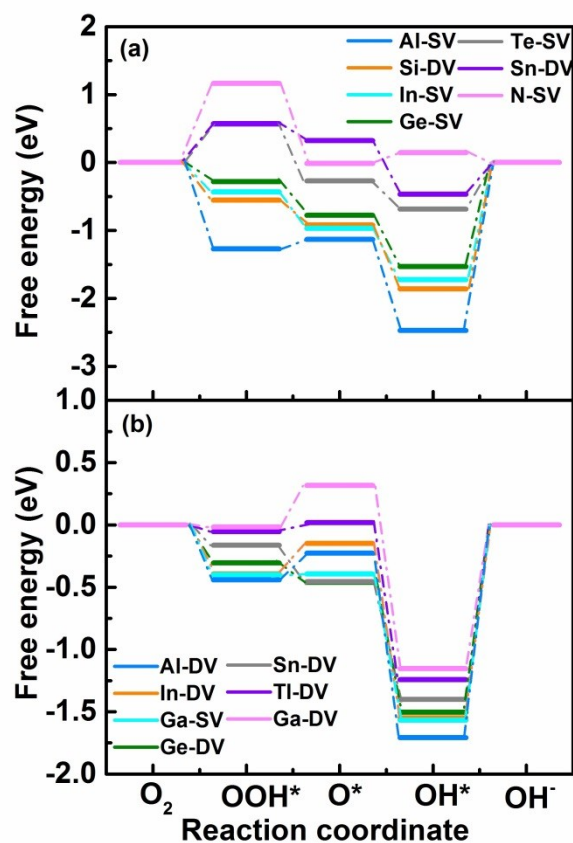

Figure S 3 The schematic Gibbs free energy diagrams of ORR for X-SV/DV with (a) or without (b) linear relationship.

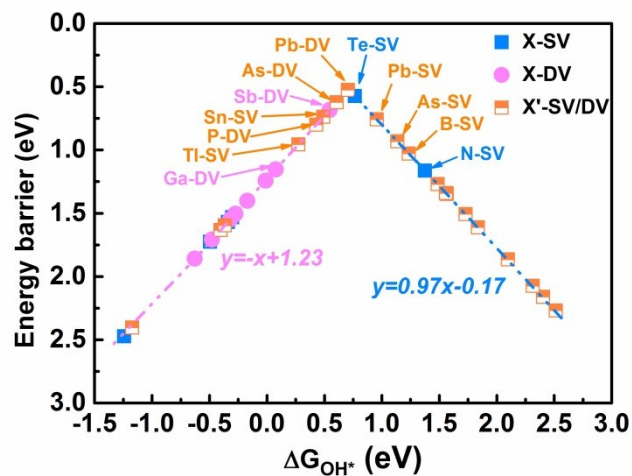

Figure S 4 The “volcanic curve” relationship between  $\Delta G_{OH^*}$  and energy barrier for all 34 catalysts.
